# Supplementary material for: Systematic analysis of feeding behaviors and their effects on feed efficiency in Pekin ducks
Source: PubMed Central journal article supplement (PMC5664582; doi:10.1186/s40104-017-0212-2), 2017-11-01

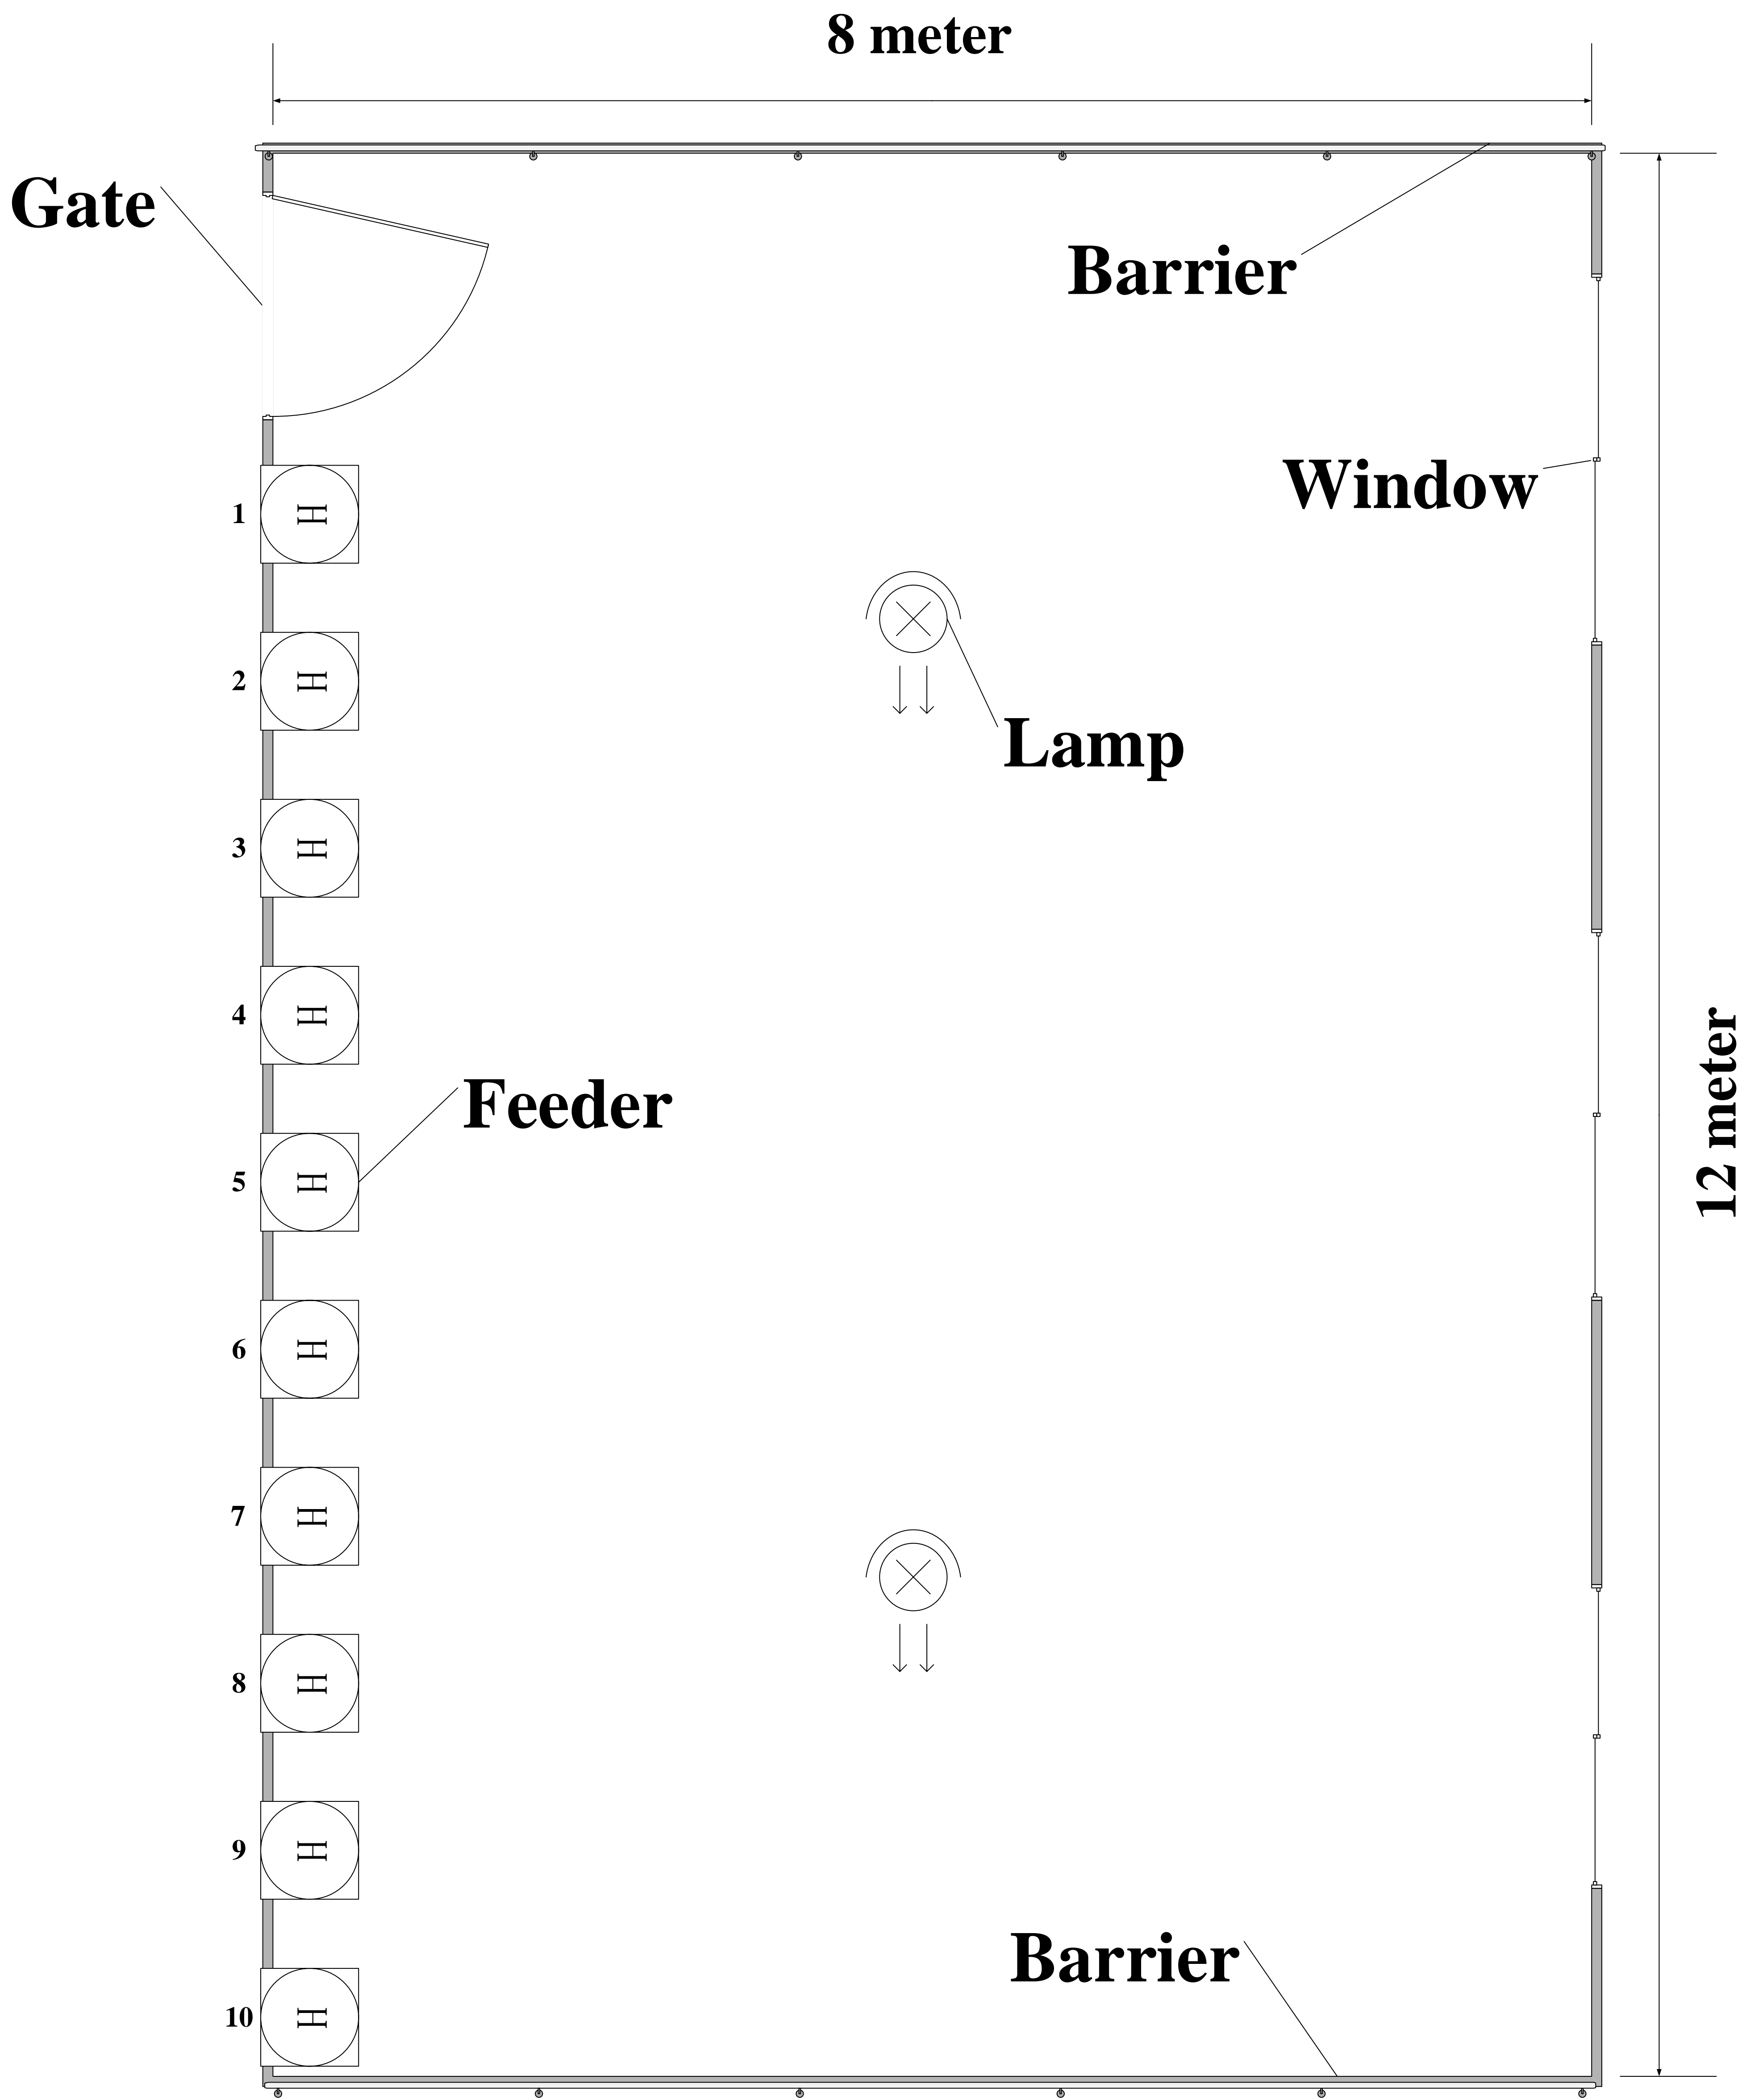

Supplement: 40104_2017_212_MOESM1_ESM.pdf [file 40104_2017_212_MOESM1_ESM.pdf]
